# Supplementary material
Source: publisher figshare collection journal article supplement (https://frontiersin.figshare.com/ndownloader/files/25682918)
Supplement: Supplementary file [file 25682918]

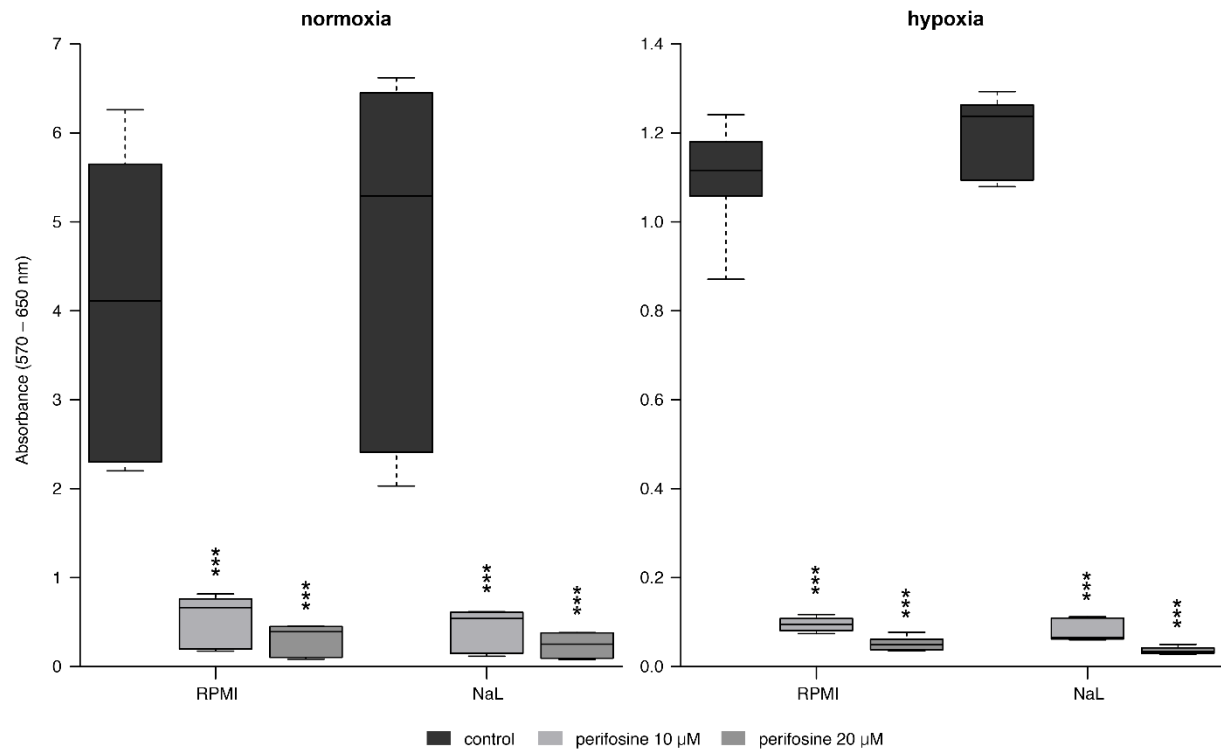

**Supplementary Figure 2: Cytotoxicity of perifosine in RPMI media compared to media with sodium lactate.** HT-29 monolayers were cultivated in RPMI medium alone or supplemented with sodium lactate (NaL) and treated with perifosine for 72 h in normoxia or hypoxia. After that, the cell viability was investigated by MTT assay. Results are presented in boxplots showing median, interquartile range, minimum and maximum values; significant difference (\*) between controls and perifosine-induced samples was evaluated by t-test, \*\*\*  $p < 0.001$ .
